# Supplementary material
Source: MDPI journal article supplement (https://www.mdpi.com/2073-4433/14/4/612)
Supplement: s1 [file s1]

**Supporting Information for**

**Measurement of phthalates in settled dust in university dormitories and  
its implications for exposure assessment**

Jiahui Wang<sup>1</sup>, Fangzhou Yuan<sup>2</sup>, Haitian Ye<sup>2</sup>, Zhongming Bu<sup>2,\*</sup>

<sup>1</sup>*School of Urban Construction, Hangzhou Polytechnic, Hangzhou 311402, China*

<sup>2</sup>*Department of Energy and Environmental System Engineering, Zhejiang University of Science and Technology, Hangzhou 310023, China*

\*Corresponding email: [zmbu@zust.edu.cn](mailto:zmbu@zust.edu.cn)

**This supporting information (4 pages) includes 3 tables.**

**Table S1.** Equations used in the calculation of daily intakes

| Pathway               | Equation                                                                    | Description                                                                                                                                                                                                                                                | No.  |
|-----------------------|-----------------------------------------------------------------------------|------------------------------------------------------------------------------------------------------------------------------------------------------------------------------------------------------------------------------------------------------------|------|
| Inhalation            | $D_{inh} = \frac{(C_g + C_{sp}) \times IR \times EF}{BW}$                   | $C_g$ is the gas-phase concentration and $C_{sp}$ is the particle-phase concentration ( $\mu\text{g}/\text{m}^3$ ), $IR$ is the daily inhalation rate ( $\text{m}^3/\text{day}$ ), $EF$ is the exposure frequency (unitless), $BW$ is the body weight (kg) | (S1) |
| Non-dietary ingestion | $D_{non-ing} = \frac{X_{dust} \times DR}{BW}$                               | $X_{dust}$ is the mass fraction of phthalates in indoor settled dust ( $\mu\text{g}/\text{g}$ ), $DR$ is the daily intake rate of indoor dust ( $\text{g}/\text{day}$ )                                                                                    | (S2) |
| Dermal-gas absorption | $D_{derm-gas} = \frac{C_g \times K_{p-g} \times SA \times f \times EF}{BW}$ | $K_{p-g}$ is indoor air transdermal coefficient ( $\text{m}/\text{day}$ ), $SA$ is the total skin surface area ( $\text{m}^2$ ), $f$ is the ratio of exposed skin surface area to the total area (unitless)                                                | (S3) |

**Table S2.** Mean values of physical properties for targeted phthalates

|                                                      | DMP                | DEP                | DnBP               | BBzP              | DEHP               | DOP                |
|------------------------------------------------------|--------------------|--------------------|--------------------|-------------------|--------------------|--------------------|
| $k_{p-g}$ (m/h) <sup>a</sup>                         | 1.03               | 3.4                | 4.8                | 5.9               | 5.8                | 5.8 <sup>b</sup>   |
| $\log K_d$ ( $\text{m}^3/\mu\text{g}$ )              | -5.48 <sup>c</sup> | -4.79 <sup>c</sup> | -3.17 <sup>c</sup> | -1.4 <sup>c</sup> | -1.21 <sup>d</sup> | -1.32 <sup>d</sup> |
| $\log K_p$ ( $\text{m}^3/\mu\text{g}$ ) <sup>e</sup> | /                  | /                  | -2.57              | -2.5              | -1.3               | -1.74              |

<sup>a</sup>Values from Weschler and Nazaroff [1].<sup>b</sup>Assumed to be the same as the value for DEHP.<sup>c</sup>Calculated based on Weschler and Nazaroff [2].<sup>d</sup>Values from Wei et al. [3].<sup>e</sup>Calculated as  $K_p = 8.32K_d$  [3]**Table S3.** Values of exposure factors for Monte-Carlo simulation

|                                                            | Mean (CV)               | Distribution |
|------------------------------------------------------------|-------------------------|--------------|
| $SA$ ( $\text{m}^2$ )                                      | 1.7 (0.04) <sup>a</sup> | lognormal    |
| $f_{\text{night}}$ (-) <sup>b</sup>                        | 0.1 (0.3)               | lognormal    |
| $f_{\text{day}}$ (-) <sup>c</sup>                          | 0.3 (0.3)               | lognormal    |
| $IR$ ( $\text{m}^3/\text{day}$ ) <sup>a</sup>              | 18.9 (0.15)             | lognormal    |
| $DR$ ( $\text{g}/\text{day}$ ) <sup>c</sup>                | 0.05 (0.3)              | lognormal    |
| $EF_{\text{night}}$ ( $\text{h}/\text{day}$ ) <sup>d</sup> | 8 (0.3)                 | lognormal    |
| $EF_{\text{day}}$ ( $\text{h}/\text{day}$ ) <sup>d</sup>   | 14 (0.3)                | lognormal    |

---

|                                                |            |           |
|------------------------------------------------|------------|-----------|
| $BW$ (kg) <sup>a</sup>                         | 68.6 (0.1) | normal    |
| $ACH$ (h <sup>-1</sup> ) <sup>c</sup>          | 0.46 (0.3) | lognormal |
| $C_{p\_out}$ (μg/m <sup>3</sup> ) <sup>f</sup> | 83.5 (0.2) | lognormal |

---

<sup>a</sup>Values from the exposure handbook for Chinese male adults [4].

<sup>b</sup>Ratio between skin surface area of the head and the total skin surface area ( $SA$ ) [5].

<sup>c</sup>Values from Bu et al. [6].

<sup>d</sup>Reasonable assumption.

<sup>e</sup>Values from Li et al. [7].

<sup>f</sup>Derived from an online database ([www.aqistudy.cn](http://www.aqistudy.cn)) for the winter season in Hangzhou.

## References

1. Weschler, C.J.; Nazaroff, W.W., SVOC exposure indoors: fresh look at dermal pathways. *Indoor Air*. **2012**, *22* (5), 356-377.
2. Weschler, C.J.; Nazaroff, W.W., SVOC partitioning between the gas phase and settled dust indoors. *Atmos. Environ.* **2010**, *44* (30), 3609-3620.
3. Wei, W.; Mandin, C.; Blanchard, O.; Mercier, F.; Pelletier, M.; Le Bot, B.; Glorennec, P.; Ramalho, O., Distributions of the particle/gas and dust/gas partition coefficients for seventy-two semi-volatile organic compounds in indoor environment. *Chemosphere*. **2016**, *153*, 212-9.
4. Ministry of Environment Protection, *Exposure factors handbook of Chinese population (in Chinese)*. China Environmental Science Press: Beijing, 2013.
5. Cao, J.; Zhang, X.; Zhang, Y., Predicting Dermal Exposure to Gas-Phase Semivolatile Organic Compounds (SVOCs): A Further Study of SVOC Mass Transfer between Clothing and Skin Surface Lipids. *Environ. Sci. Technol.* **2018**, *52* (8), 4676-4683.
6. Bu, Z.; Mmereki, D.; Wang, J.; Dong, C., Exposure to commonly-used phthalates and the associated health risks in indoor environment of urban China. *Sci. Total Environ.* **2019**, *658*, 843-853.
7. Li, B.; Cheng, Z.; Yao, R.; Wang, H.; Yu, W.; Bu, Z.; Xiong, J.; Zhang, T.; Essah, E.; Luo, Z.; Shahrestani, M.; Kipen, H., An investigation of formaldehyde concentration in residences and the development of a model for the prediction of its emission rates. *Build. Environ.* **2019**, *147*, 540-550.
